# Supplementary material for: The Impact of COVID-19 Related Changes on Air Quality in Birmingham, Alabama, United States
Source: MDPI journal article supplement (doi:10.3390/ijerph19063168), 2022-03-08
Supplement: s1 [file s1]

## **Supplementary Material**

### 1. Supplemental Tables

US EPA central air monitoring site locations in Birmingham, Alabama (Jefferson County and nearby suburbs) where pollutant data were obtained are given below.

Table S1: Locations of central air monitoring sites that provided data for the study

| Sl. No | Pollutant         | Sites 2019                                                                                               | Sites 2020                                                                                            |
|--------|-------------------|----------------------------------------------------------------------------------------------------------|-------------------------------------------------------------------------------------------------------|
| 1      | PM <sub>2.5</sub> | -North Birmingham<br>-Mc Adory<br>-Leeds<br>-Wylam<br>-Arkadelphia<br>-Corner<br>-Sloss Shuttlesworth    | -North Birmingham<br>-Mc Adory<br>-Leeds<br>-Wylam<br>-Arkadelphia<br>-Corner<br>-Sloss Shuttlesworth |
| 2      | NO <sub>2</sub>   | -North Birmingham<br>-Arkadelphia                                                                        | -North Birmingham<br>-Arkadelphia                                                                     |
| 3      | O <sub>3</sub>    | -North Birmingham<br>-McAdory<br>-Fairfield<br>-Leeds<br>-Corner<br>Terrant Elementary School<br>-Helena | -North Birmingham<br>-McAdory<br>-Leeds<br>-Corner<br>-Terrant Elementary School<br>-Helena           |
| 4      | CO                | -North Birmingham<br>-Fairfield<br>-Arkadelphia                                                          | -North Birmingham<br>-Fairfield<br>-Arkadelphia                                                       |
| 5      | SO <sub>2</sub>   | -North Birmingham<br>-Fairfield                                                                          | -North Birmingham<br>-Fairfield                                                                       |

## 2. Supplemental Figures

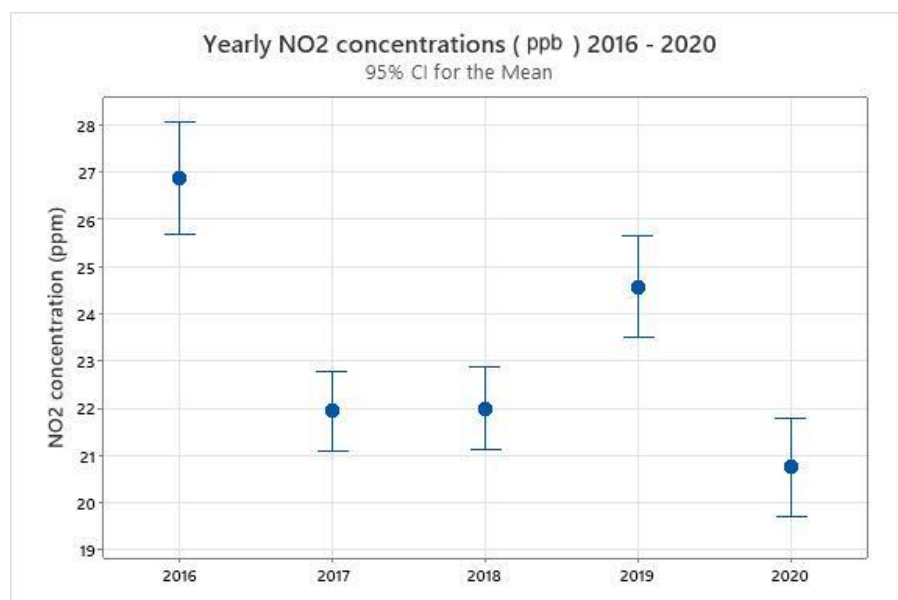

Figure S1: Annual mean NO<sub>2</sub> concentrations (ppb) from year 2016 – 2020. Error bars represent 95% confidence interval of the mean

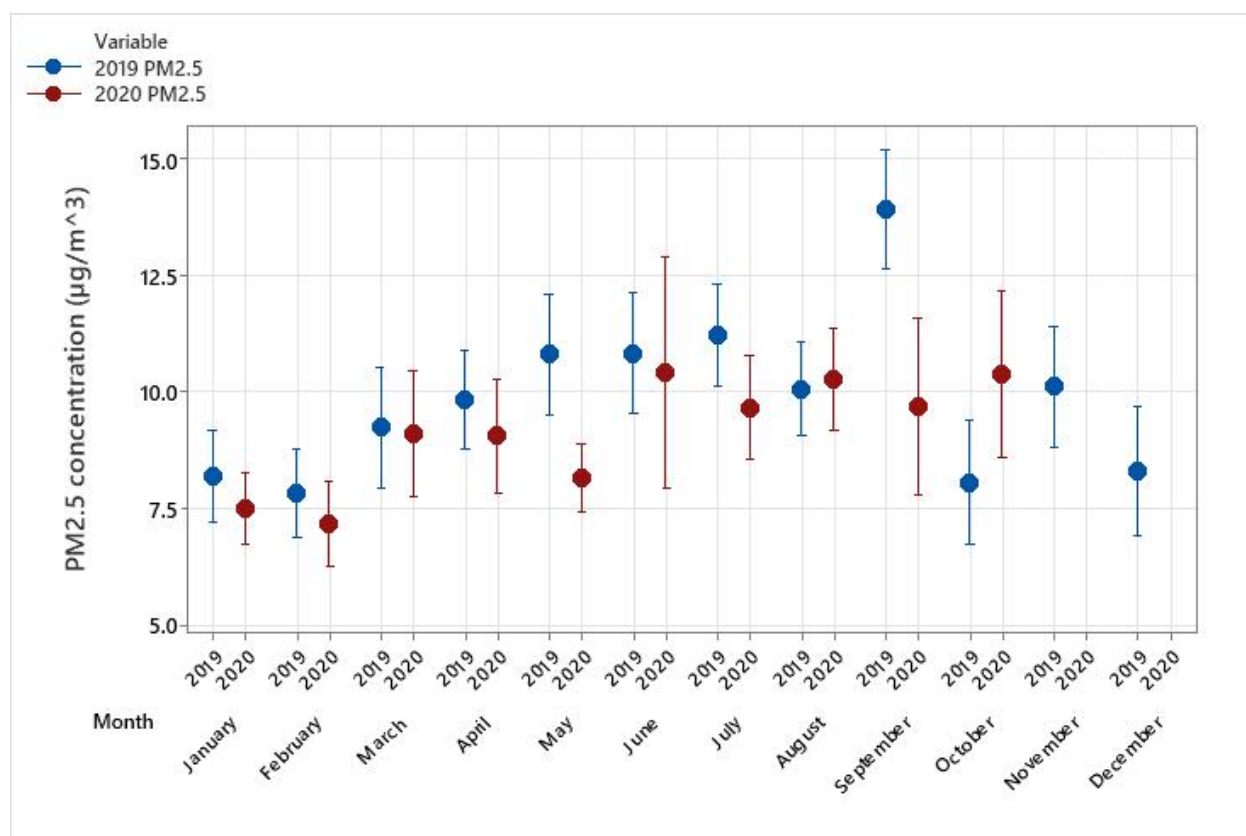

Figure S2: Monthly mean PM<sub>2.5</sub> concentrations (µg/m<sup>3</sup>) in years 2019 and 2020. Error bars represent 95% confidence interval of the mean
